1 **Microevolution of acquired colistin resistance in Enterobacteriaceae from ICU patients receiving**  
2 **selective decontamination of the digestive tract.**

3

4 Axel B. Janssen<sup>a</sup>, Denise van Hout<sup>b</sup>, Marc J.M. Bonten<sup>a,b</sup>, Rob J.L. Willems<sup>a</sup>, Willem van Schaik<sup>a,c</sup>

5

6 <sup>a</sup> Department of Medical Microbiology, University Medical Center Utrecht, Utrecht University,  
7 Heidelberglaan 100, 3584CX, Utrecht, The Netherlands.

8 <sup>b</sup> Julius Center for Health Sciences and Primary Care, University Medical Center Utrecht, Utrecht  
9 Universit, Heidelberglaan 100, 3584CX, Utrecht, The Netherlands

10 <sup>c</sup> Institute of Microbiology and Infection, College of Medical and Dental Sciences, University of  
11 Birmingham, Edgbaston, Birmingham B15 2TT, United Kingdom.

12

13 # Address correspondence to Willem van Schaik, [w.vanschaik@bham.ac.uk](mailto:w.vanschaik@bham.ac.uk), telephone: +44 121 414  
14 6913

15

16

17 **Abstract**

18

19 Colistin is an antibiotic that targets the lipopolysaccharides present in the membranes of  
20 Gram-negative bacteria. It is used as last-resort drug to treat infections with multidrug-resistant strains.  
21 Colistin is also used in selective decontamination of the digestive tract (SDD), a prophylactic therapy  
22 used in patients hospitalised in intensive care units (ICUs) to selectively eradicate opportunistic pathogens  
23 in the oropharyngeal and gut microbiota. In this study, we aimed to unravel the mechanisms of acquired  
24 colistin resistance in Gram-negative opportunistic pathogens obtained from SDD-treated patients.

25 Routine surveillance of 428 SDD-treated patients resulted in thirteen strains with acquired colistin  
26 resistance (*Escherichia coli* n=9; *Klebsiella aerogenes*, n=3; *Enterobacter asburiae*, n=1) from five  
27 patients. Genome sequence analysis showed that these isolates represented multiple distinct  
28 colistin-resistant clones, but that within the same patients, colistin-resistant strains were clonally related.  
29 We identified previously described mechanisms that lead to colistin resistance, i.e. a G53 substitution in  
30 the response regulator PmrA/BasR, and the acquisition of the mobile colistin resistance gene *mcr-1.1*, but  
31 we also observed novel variants of *basR* with an 18-bp deletion, and a G19E substitution in the sensor  
32 histidine kinase BasS. We experimentally confirmed these variants to contribute to reduced colistin  
33 susceptibility. In a single patient, we observed that colistin resistance in a single *E. coli* clone evolved  
34 through two unique variants in *basRS*.

35 We show that prophylactic use of colistin during SDD can select for colistin resistance in species  
36 that are not intrinsically colistin-resistant. This highlights the importance of continued surveillance for the  
37 emergence of colistin resistance in patients treated with SDD.

## 38 Introduction

39

40 Selective decontamination of the digestive tract (SDD) is a prophylactic antibiotic regimen used  
41 in Dutch intensive care units (ICUs) which lowers the mortality in ICU-admitted patients through the  
42 selective eradication of opportunistic pathogens in the oropharyngeal and gut microbiota.<sup>1</sup> One of the  
43 targets of SDD are the Enterobacteriaceae, which are collectively responsible for a significant proportion  
44 of hospital-acquired infections.<sup>2-6</sup> In SDD, a combination of the antibiotics colistin and tobramycin and  
45 the antifungal amphotericin B, is applied to the digestive tract of ICU patients. In addition, during the first  
46 four days of ICU stay, patients are also intravenously administered a biliary-excreted third-generation  
47 cephalosporin, contributing to the eradication of Gram-negative pathogens from the gut.<sup>2</sup> The use of SDD  
48 is accompanied by surveillance for potential colonisation of the digestive tract by tobramycin- and/or  
49 colistin-resistant Enterobacteriaceae.<sup>7</sup>

50 Colistin is a cationic cyclic polypeptide with a hydrophobic fatty acid acyl chain that specifically  
51 acts on Gram-negative bacteria. Colistin electrostatically interacts with the anionic phosphate groups of  
52 the lipid A moiety of lipopolysaccharide (LPS) molecules in the outer leaflet of the outer membrane.<sup>8,9</sup>  
53 Through binding to the phosphate groups, and insertion of its hydrophobic domains, colistin destabilizes  
54 the outer membrane. After disruption of the outer membrane, colistin targets the LPS that is resident in  
55 the cytoplasmic membrane after its synthesis in the cytoplasm. The destabilization of the cytoplasmic  
56 membrane ultimately kills the cell.<sup>10-12</sup>

57 The most frequent mechanisms of colistin resistance involve the reduction of the anionic charges  
58 of lipid A, which reduces the electrostatic interactions between colistin and LPS. This is achieved by the  
59 covalent linkage of positively charged groups like phosphoethanolamine or 4-amino-4-deoxy-L-arabinose  
60 to the phosphate groups of lipid A.<sup>12</sup> Addition of these groups to lipid A is achieved by the products of the  
61 EptA-, and Arn-operons, respectively.<sup>13</sup> The transcriptional activity of these operons is controlled by the  
62 two-component regulatory systems PhoPQ and PmrAB (BasRS in *Escherichia coli*). Colistin resistance  
63 mutations resulting in the permanent activation of these two-component regulatory systems often occur in

64 specific hotspots (e.g. Gly-53 and Arg-81 in BasR/PmrA, and Ala-159 in BasS/PmrB).<sup>14,15</sup> Surveillance  
65 for colistin resistance has recently led to the discovery of novel mechanisms of colistin resistance,  
66 including Leu-10 substitutions in BasS/PmrB,<sup>16</sup> but most importantly the acquisition of *mcr*-genes.<sup>17</sup> For  
67 *E. coli*, the acquisition of *mcr*-carrying mobile genetic elements is a particularly important mechanism  
68 through which colistin resistance may occur.<sup>18</sup> Other mechanisms of acquired colistin resistance in  
69 Enterobacteriaceae include the production of capsular polysaccharides,<sup>19</sup> and efflux pump activation.<sup>20</sup>

70 The use of SDD is not widely accepted,<sup>21</sup> which is at least partially due to the increasing  
71 importance of colistin as a last-resort antibiotic for the treatment of infections caused by  
72 multidrug-resistant Gram-negative pathogens.<sup>22,23</sup> There thus exists an interest in understanding the  
73 ability of colistin-resistant strains to emerge and spread during SDD, and to characterise the mechanisms  
74 that cause colistin resistance in Enterobacteriaceae from SDD-treated patients. In this work, we analyse  
75 thirteen colistin-resistant strains (nine *E. coli* strains, three *Klebsiella aerogenes* strains and one  
76 *Enterobacter asburiae* strain) from SDD-treated ICU patients through whole genome sequencing and  
77 investigate the mechanisms that have contributed to colistin resistance.

78

79 **Material and methods**

80

81 **Bacterial strains, growth conditions, chemicals, plasmid isolation, and oligonucleotide primers**

82 Colistin-resistant strains were isolated from SDD-treated patients that were hospitalised in the  
83 ICU of the University Medical Centre Utrecht, The Netherlands, between July 2018 to January 2019, as  
84 previously described.<sup>24</sup> We also included colistin-susceptible strains of the same species that were isolated  
85 from the same patient at the same day from which a colistin-resistant strain was isolated. *E. coli* strain  
86 BW25113 and the BW25113-derived  $\Delta$ *basRS* strain BW27848 from the Keio collection were obtained  
87 from the Coli Genetic Stock Center.<sup>25,26</sup> All strains were grown in Lysogeny Broth (LB; Oxoid,  
88 Landsmeer, The Netherlands) at 37°C with agitation at 300 rpm unless otherwise noted. Strains  
89 containing pGRG36 were grown at 30°C.<sup>27</sup> When appropriate, kanamycin (50 mg/L; Sigma-Aldrich,  
90 Zwijndrecht, The Netherlands), and ampicillin (100 mg/L; Sigma-Aldrich) were used. Colistin sulphate  
91 was obtained from Duchefa Biochemie (Haarlem, The Netherlands). L-(+)-arabinose was obtained from  
92 Sigma-Aldrich. Plasmids were purified using the GeneJET Plasmid Miniprep kit (Thermo Fisher  
93 Scientific, Landsmeer, The Netherlands). Oligonucleotide primers (Supplemental Table 1) were obtained  
94 from Integrated DNA Technologies (Leuven, Belgium).

95

96 **Determination of minimal inhibitory concentration**

97 Minimal inhibitory concentrations (MICs) of colistin were determined using a broth  
98 microdilution method in line with EUCAST guidelines,<sup>28</sup> as previously described.<sup>15,29</sup> The breakpoint  
99 values for colistin resistance ( $\text{MIC} \leq 2$  mg/L) in Enterobacteriaceae were obtained from the 2019  
100 European Committee on Antimicrobial Susceptibility Testing guidelines (EUCAST;  
101 [http://www.eucast.org/clinical\\_breakpoints/](http://www.eucast.org/clinical_breakpoints/)).

102

103 **Genomic DNA isolation and whole-genome sequencing**

104 Genomic DNA was isolated, and checked for quality, as described previously.<sup>15</sup> Sequence  
105 libraries for Illumina sequencing were prepared using the Nextera XT kit (Illumina, San Diego, CA)  
106 according to the manufacturer's instructions. Libraries were sequenced on an Illumina NextSeq 500  
107 system with a 300-cycle (2 × 150 bp) NextSeq 500/550 Mid Output v2.5 kit.

108

### 109 **Genome assembly, MLST typing, and identification of antibiotic resistance genes**

110 Illumina sequencing data were assessed (FastQC v0.11.7), and trimmed (nesoni v0.115) for  
111 quality, and used for *de novo* genome assembly (SPAdes v3.12.0), as described before.<sup>15,30</sup> MLST typing  
112 was performed using the mlst package v2.10 (<https://github.com/tseemann/mlst>). Assembled contigs were  
113 screened for acquired antibiotic resistance genes using ResFinder 3.2 using standard settings.<sup>31</sup>

114

### 115 **Construction of core genome phylogenetic trees.**

116 Genome assemblies of the sequenced strains were aligned with publicly available genomes of the  
117 same species obtained from NCBI databases (Supplemental Table 2). Conserved regions of genomes were  
118 identified and aligned using ParSNP v1.2.<sup>32</sup> FigTree v1.4.3 (<http://tree.bio.ed.ac.uk/software/figtree/>) was  
119 used to visualize the phylogenetic tree.

120 To construct the phylogenetic tree for the clonal strains obtained from patient 31, the genomes of  
121 these strains were aligned using snippy v4.4.2 (<http://github.com/tseemann/snippy>). The alignment was  
122 filtered for recombination using gubbins v2.4.1.<sup>33</sup> Polymorphic sites were subsequently identified through  
123 snp-sites v2.5.1.<sup>34</sup> A phylogenetic tree was constructed using FastTree v2.1.10.<sup>35</sup> The phylogenetic tree  
124 was visualized as described above.

125

### 126 **Determination of SNPs and indels through short-read sequences**

127 Read-mapping of Nesoni-filtered reads was performed using Bowtie2.<sup>36</sup> SNP and indel-calling  
128 was performed using SAMtools 0.1.19<sup>37</sup> through the settings described before.<sup>38</sup> Identified SNPs and  
129 indels were manually linked to features in the Prokka annotation, and inspected for synonymous versus

130 non-synonymous mutations. Identified mutations SNPs and indels were confirmed by performing PCR  
131 and Sanger sequencing (Macrogen, Amsterdam, The Netherlands)

132

### 133 **Genome comparisons through Enterobase**

134 To identify mutations that could potentially contribute to colistin resistance in the *E. coli* strains  
135 260 and 263, Raw Illumina sequence reads were uploaded to, and assembled by, Enterobase<sup>39</sup> under  
136 barcode ESC\_OA6301AA and ESC\_OA6302AA respectively. The *E. coli* cgMLST scheme was used to  
137 define a closest relative in Enterobase and the assemblies of these strains were then used in comparative  
138 analyses. Identified sequence variations in the colistin-resistant strains were confirmed by PCR and  
139 Sanger sequencing (Macrogen, Amsterdam, The Netherlands)

140

### 141 **Construction of chromosomal *basRS* transgene insertions**

142 Single-copy chromosomal transgene insertion mutants of *basRS*, derived from clinical strains,  
143 were constructed in BW27848 using the Tn7-transposon system located on the pGRG36 plasmid,<sup>27,40</sup> as  
144 previously described.<sup>15</sup>

145

### 146 **Determination of maximum specific growth rate**

147 To determine the maximum specific growth rate, a Bioscreen C instrument (Oy Growth Curves  
148 AB, Helsinki, Finland) was used. Overnight cultures were used to inoculate 200 µl fresh LB medium  
149 1:1000. Incubation was set at 37°C with continuous shaking set to have maximum amplitude and fastest  
150 speed. Growth was observed by measuring the absorbance at 600 nm every 10 minutes.

151

### 152 **Data availability**

153 Sequence data has been deposited in the European Nucleotide Archive (accession number  
154 PRJEB34028).

155

156 **Statistical analysis**

157           Where applicable, statistical significance was determined using parametric one-way ANOVA  
158 tests. Correction for multiple comparison testing was performed for with a Tukey's (for the all-versus-all  
159 comparison of *E. coli* strains of patient 31), or a Dunnett's (for the *K. aerogenes* strains of patient 37)  
160 multiple comparison test. Family-wise significance was defined as a p-value < 0.05.

161



162 **Results**

163

164 **Strains with acquired colistin resistance are rarely isolated during SDD.**

165 As described in our previous work,<sup>24</sup> 388 Gram-negative strains were isolated from 1105 rectal  
166 swabs, from 428 patients receiving SDD. Of these, 102 strains belonged to species that are intrinsically  
167 resistant to colistin. The remaining 286 isolates were tested for colistin susceptibility on  
168 Sensititre™ FRCOL plates (Thermo Fisher Scientific, Wesel, Germany). A total of ten *E. coli* strains, one  
169 *E. asburiae* strain, and three *K. aerogenes* strains were found to be resistant to colistin through this  
170 method. We then tested these strains for colistin susceptibility in a standardized broth microdilution assay  
171 and all strains were phenotypically resistant to colistin with the exception of *E. coli* strain 89, which was  
172 excluded from further analyses (Table 1). Thus, we found thirteen strains (4.5% of the  
173 non-intrinsically-resistant isolates) to be colistin-resistant. The colistin-resistant *K. aerogenes* and *E. coli*  
174 strains had MIC values up to 32 mg/L colistin. The MIC of the *E. asburiae* strain was found to reach  
175 values up to 8192 mg/L colistin. For patients 27 and 37, colistin-susceptible strains of the same species  
176 were also isolated from rectal swabs during surveillance (Figure 1).

177 In total, five of the 428 patients (1.2%) tested positive for an isolate with acquired colistin  
178 resistance. Of the ten *E. coli* strains, seven were isolated from one patient, the remaining three strains  
179 originated from three other patients. The three *K. aerogenes* strains were isolated from a single patient.  
180 None of the patients carried multiple colistin-resistant species. Of the five patients from whom a strain  
181 with acquired colistin resistance was isolated, only patient 307 carried a colistin-resistant strain  
182 (*E. asburiae*) at the start of ICU admission, suggesting that this patient had acquired the colistin-resistant  
183 strain prior to SDD treatment (Figure 1). This strain was no longer present on any of the following  
184 time-points. Patients 311 and 27 were transiently colonised by colistin-resistant strains at 2 and 3 days  
185 after ICU admission, respectively. In patient 37 colistin-resistant *K. aerogenes* were detected at day 15,  
186 and day 18 of ICU hospitalisation, while strains with acquired colistin resistance were not cultured during  
187 subsequent screening from day 22 to discharge from the ICU on day 75. Colistin-resistant *E. coli* were

188 first detected in patient 31 at day 9 of ICU hospitalisation and remained colonised with colistin-resistant  
189 *E. coli*, until the patient was lost to follow up at day 24, with the exception of a negative culture result on  
190 day 20.

191  
192 **Colistin-resistant strains from ICU patients have a diverse genetic background and carry a variety**  
193 **of acquired antibiotic-resistance genes**

194 Clonal relatedness of colistin-resistant *E. coli* and *K. aerogenes* strains colonising the ICU  
195 patients was assessed by constructing core genome phylogenies, using the genome sequences generated in  
196 this study and a collection of publicly available genomes. We observed that three distinct clones of  
197 colistin-resistant *E. coli* colonised three individual patients (Figure 2A). The colistin-susceptible *E. coli*  
198 strain 137 from patient 27 did not cluster with colistin-resistant *E. coli* strain 138 isolated from the same  
199 patient. All *K. aerogenes* strains isolated from patient 37 belonged to a single clone (Figure 2B).

200 We screened the assembled genomes of the colistin-resistant strains for acquired antibiotic  
201 resistance genes (Figure 2C). We identified that strain *E. coli* strain 138 was positive for the *mcr-1.1*  
202 gene, which was the sole antibiotic resistance gene on a 59.5 kbp contig that contained an IncI2-type  
203 replicon. The sequence of this contig shared 99% identity with plasmid sequences obtained from multiple  
204 sources, including from a *Salmonella enterica* subsp. *enterica* serovar Typhimurium strain from a patient  
205 from China (accession number MH522416.1),<sup>41</sup> and an *E. coli* strain isolated from chicken faeces in  
206 Thailand (accession number MG557851.1),<sup>42</sup> illustrating the global spread of this plasmid. In addition, we  
207 found that the colistin-resistant *E. coli* strains carried between 2 and 12 antibiotic resistance genes,  
208 including genes conferring resistance to aminoglycosides and  $\beta$ -lactams. The *K. aerogenes* strains only  
209 carried the fosfomycin resistance gene *fosA*, and the single *E. asburiae* strain had *fosA* and the  
210 AmpC-type  $\beta$ -lactamase *blaACT-4*.

211

212 **In-patient microevolution of colistin resistance in *Escherichia coli* during SDD.**

213 To investigate the microevolution towards colistin resistance during gut colonisation, we  
214 investigated the genetic diversity between the four clonally related *K. aerogenes* strains from patient 37,  
215 and the seven colistin-resistant *E. coli* strains isolated from patient 31. By comparing the genome of the  
216 single colistin-susceptible *K. aerogenes* strain with the genomes of the colistin-resistant strains, we  
217 determined that all colistin-resistant strains had a G53S substitution in the PmrA transcriptional regulator  
218 of the PmrAB two-component regulatory system. This substitution has previously been described to cause  
219 colistin resistance in *K. aerogenes*.<sup>43</sup> In addition, we observed an insertion of a single guanine nucleotide  
220 in the gene encoding the sulphate adenylyltransferase subunit 2 CysD, which is involved in sulphate  
221 assimilation. CysD has not been previously described in relation to colistin resistance. No mutations  
222 differentiating the three colistin-resistant strains were observed.

223 The seven clonally related colistin-resistant *E. coli* isolates from patient 31 were obtained on four  
224 separate days, over a two-week period (Table 1, Figure 2A). Within these strains, we observed that the  
225 strains isolated on 1 and 5 November 2018 (strains 260, 262, and 274) had a G53A substitution in the  
226 BasR transcriptional regulator of the BasRS two-component regulatory system. This substitution has  
227 previously been experimentally proven to contribute to colistin resistance in *E. coli*.<sup>15</sup> The strains isolated  
228 after November 5, 2018 (strains 281, 292, 296, and 297) however, did not encode the G53A BasR  
229 substitution. Instead, we observed an 18-bp deletion (nucleotides 10 through 27) in *basS*, leading to the  
230 deletion of six amino acids (4 through 9) at the N-terminal end of BasS.

231 Through phylogenetic analysis of these seven clonally related strains, we observed that the strains  
232 carrying the G53A BasR substitution, and those with the 18-bp deletion in *basS*, were intermingled  
233 (Figure 3A). Three strains that were all isolated on 14 November 2018 (strains 292, 296, and 297) had a  
234 mucoid phenotype (Figure 3B) and carried an I424S substitution in Yrff that was absent in the non-  
235 mucoid strains. Yrff is a homolog of IgaA in *Salmonella*, and functions as a negative regulator of the Rcs  
236 phosphorelay system, and is thus involved in regulation of capsule production.<sup>44</sup>

237 To establish the impact of colistin resistance on fitness, we determined the strains' maximum  
238 specific growth rate. Among the strains from patient 31, we observed a reduction of about 15% in

239 maximum specific growth rate in the strains harbouring the 18-bp deletion in *basS*, compared to those  
240 harbouring the G53A BasR substitution (Figure 3C). A similar decrease in maximum specific growth rate  
241 is observed in the strains that have the I424S substitution in Yrff. For the *K. aerogenes* strains isolated  
242 from patient 37 that had the G53S PmrA substitution, we did not observe a change in the maximum  
243 specific growth rate (Supplemental Figure 1).

244

#### 245 **Mutations in *basS* contribute to reduced susceptibility to colistin.**

246 To identify mutations that potentially contributed to colistin resistance in *E. coli* strain 263, for  
247 which we lacked an isogenic, colistin-susceptible counterpart, we used the Enterobase database to identify  
248 the strain (eo2071, which was not reported to be colistin-resistant; Enterobase barcode ESC\_BA7113AA)  
249 that is most closely related to strain 263. We then compared the sequence of *basRS* of strain eo2071 to  
250 *basRS* of strain 263, leading to the identification of a G19E substitution in BasS in the latter strain.

251 We next aimed to investigate the relevance of the 18-bp deletion in *basS* and the mutation leading  
252 to the G19E substitution for colistin resistance in *E. coli*. Due to the multidrug-resistant nature of the  
253 colistin-resistant strains, we constructed chromosomal integration mutants of the genes encoding the  
254 mutated BasRS two-component regulatory system in the *attTn7* site in the BW25113 derived  $\Delta$ *basRS*  
255 strain BW27848, as described previously.<sup>15</sup> MIC determinations of the chromosomal integration mutants  
256 showed that introduction of the *basRS* alleles of the colistin-resistant strains led to reduced susceptibility  
257 to colistin (Table 2). The MIC value of the BW27848 strain with the insertion of *basRS* encoding the  
258 18-bp deletion in *basS* increased 4-fold. The MIC value of the BW27848 strain with the *basRS* encoding  
259 the G19E substitution in *basR* increased 2-fold. Restoring the deleted 18 base-pairs to *basS*, or reversing  
260 the G19E BasR substitution, returned colistin susceptibility to BW25113 levels.

261

262 **Discussion**

263

264 In this study, we genomically characterized strains with acquired colistin resistance from ICU  
265 patients treated with SDD. Thirteen strains, from three species with acquired colistin resistance were  
266 isolated. The carriage rate of strains with acquired colistin resistance among SDD-treated ICU patients  
267 (1.2%) was similar to rates previously reported for Dutch ICUs.<sup>6,15,45</sup> We found multiple distinct clones  
268 of colistin-resistant strains among patients. Colistin resistance in the *E. coli* strains could be explained by  
269 the acquisition of *mcr-1.1*, a G53A or G19E substitution in BasR, or an 18-bp deletion in *basS*. The 18-bp  
270 deletion in *basS* was associated with a loss of fitness. Colistin resistance in the *K. aerogenes* strains was  
271 associated with a G53S substitution in PmrA. The mechanism of colistin resistance in the *E. asburiae*  
272 strain was not identified.

273 Through longitudinal sampling, we are able to observe selection and microevolutionary processes  
274 related to prolonged exposure to colistin. We found that colistin resistance in a clonal *E. coli* population  
275 may emerge through different mutational trajectories in *basRS*, as observed in the strains obtained from  
276 patient 31. The placement of strains with different mutations in *basRS* (either causing a G53A BasR  
277 substitution or a 18-bp deletion in *basS*) on distinct branches of the phylogenetic tree, suggests that strains  
278 with both mutations have emerged independently. The observation of two distinct variants in *basRS* that  
279 contribute to colistin resistance in a clonal *E. coli* population, reflects the ability of *E. coli* to quickly  
280 adapt to novel niches and selective pressures through multiple evolutionary pathways.<sup>46–48</sup> This *E. coli*  
281 clone was likely able to persistently colonise the patient because it carried mechanisms that confer  
282 resistance to all antibiotics (cephalosporins, tobramycin, and colistin) used in SDD. Through longitudinal  
283 sampling of isogenic colistin-susceptible and colistin-resistant *E. coli* strains from patients 27 and 37, we  
284 observed that colistin resistance emerged *de novo* in these strains. For the strains isolated from patients  
285 307 and 311, we cannot exclude the possibility that these strains could have already acquired colistin  
286 resistance before they colonised the patient.

287 We observed transient colonisation by an *mcr-1.1* carrying *E. coli* in a single patient receiving  
288 SDD. Transient gut colonisation by *mcr*-carrying *E. coli* has previously been observed in the context of  
289 international travel, and may reflect the reduced fitness of *E. coli* strains carrying *mcr*-genes.<sup>49-51</sup>  
290 High-level colistin resistance was observed in an *Enterobacter asburiae* strain, a member of the  
291 *E. cloacae* complex,<sup>52</sup> and a clonal population of colistin-resistant *K. aerogenes*. A limited number of  
292 high-level resistant *E. asburiae*,<sup>53-57</sup> and *K. aerogenes*<sup>43,58-60</sup> strains have been described before.  
293 However, the exact mechanisms through which colistin resistance evolves in these species remain poorly  
294 studied.<sup>43,61</sup>

295 Prolonged exposure to antibiotics will select for resistance, which generally comes at a fitness  
296 cost. Fitness of an antibiotic-resistant clone can subsequently increase due to the accumulation of  
297 compensatory mutations.<sup>62</sup> Interestingly, we observed a reduction of the maximum specific growth rate in  
298 the *E. coli* strains in which *yrfF* was mutated, which likely contributed to the mucoid phenotype in these  
299 strains. The increased biosynthesis of capsular polysaccharides is likely to come at a cost that will  
300 negatively impact maximum specific growth rate. While mucoidy has been linked to colistin resistance in  
301 *K. pneumoniae*, and *Neisseria meningitides*,<sup>19,63,64</sup> we did not observe a difference in the colistin MICs of  
302 clonally related non-mucoid and mucoid *E. coli* strains. Mucoidy in *E. coli* is a relatively poorly  
303 understood phenotype, but it is likely to contribute to increased survival upon humoral and cellular  
304 immune responses.<sup>65,66</sup>

305 In this study, we find that Gram-negative opportunistic pathogens carried in the gut of patients  
306 can acquire colistin resistance, either through mutation of genes that regulate lipid A modifications or by  
307 the acquisition of the *mcr-1.1* gene. However, the low prevalence of colistin-resistant strains in ICU  
308 patients suggests that the evolution of colistin resistance is currently of minor concern for the  
309 implementation of SDD in Dutch hospitals. As the prevalence of multidrug-resistant Gram-negative  
310 bacteria in the Netherlands is low, strains colonising patients will be generally susceptible to one or more  
311 of the antibiotics used in SDD. Indeed, in four patients, strains with acquired colistin resistance were  
312 rapidly eradicated from the gut. However, the long-term colonisation of patient 31 with an *E. coli* clone

313 that is colistin resistant and carries genes conferring resistance to the other antibiotics used in SDD,  
314 indicates that SDD can select for multidrug-resistant Gram-negative bacteria in the gut of ICU patients.  
315 The risk of the emergence of colistin resistance in the patient gut may be more pronounced in countries  
316 where higher rates of circulating antibiotic resistant bacteria are observed, or in settings with failing  
317 infection control.<sup>6,22,67,68</sup> Continuous surveillance is thus vital to thwart selection and spread of  
318 multidrug-resistant strains upon SDD. Further studies are required to better understand the diversity of  
319 mechanisms of acquired colistin resistance in clinical Enterobacteriaceae isolates, particularly in species  
320 like *E. asburiae*, and *K. aerogenes* in which colistin resistance mechanisms have so far been poorly  
321 studied.  
322

323 **Acknowledgements**

324 We thank Johanna C. Braat, Ellen C. Brouwer, Malbert R.C. Rogers, Moniek Salomons, and the  
325 Department of Genetics at the Wilhelmina Children's Hospital, for their expertise on Illumina NextSeq  
326 sequencing. We thank Rob Rentenaar, and Judith Vlooswijk for providing the strains that were studied  
327 here.

328

329 **Funding**

330 This work was supported by The Netherlands Organisation for Scientific Research through a Vidi  
331 grant (grant number 917.13.357); and a Royal Society Wolfson Research Merit Award (grant number  
332 WM160092), both to W.v.S. The funders had no role in study design, data collection and interpretation,  
333 or the decision to submit the work for publication.

334

335 **Transparency**

336 The authors disclose no conflicts of interest.

337

338 **Author contributions**

339 A.B.J. conceived and designed experiments, performed experiments, analysed data, and wrote the  
340 manuscript. D.v.H. reviewed patients records and microbiological data. M.J.M.B. wrote the manuscript.  
341 R.J.L.W. wrote the manuscript. W.v.S. conceived and designed experiments, wrote the manuscript, and  
342 supervised the study. All authors reviewed and approved the final version of the manuscript.

343



344 **References**

- 345 1. Plantinga NL, de Smet AMGA, Oostdijk EAN, *et al.* Selective digestive and oropharyngeal  
346 decontamination in medical and surgical ICU patients: individual patient data meta-analysis. *Clin*  
347 *Microbiol Infect* 2018; 24: 505–13.
- 348 2. de Smet AMGA, Kluytmans JAJW, Cooper BS, *et al.* Decontamination of the digestive tract and  
349 oropharynx in ICU patients. *N Engl J Med* 2009; 360: 20–31.
- 350 3. Sievert DM, Ricks P, Edwards JR, *et al.* Antimicrobial-resistant pathogens associated with healthcare-  
351 associated infections summary of data reported to the national healthcare safety network at the Centers for  
352 Disease Control and Prevention, 2009–2010. *Infect Control Hosp Epidemiol* 2013; 34: 1–14.
- 353 4. Peleg AY, Hooper DC. Hospital-acquired infections due to Gram-negative bacteria. *N Engl J Med*  
354 2011; 362: 1804–13.
- 355 5. Wittekamp BH, Plantinga NL, Cooper BS, *et al.* Decontamination strategies and bloodstream  
356 infections with antibiotic-resistant microorganisms in ventilated patients: a randomized clinical trial. *J Am*  
357 *Med Assoc* 2018; 320: 2087–98.
- 358 6. Oostdijk EAN, Kesecioglu J, Schultz MJ, *et al.* Effects of decontamination of the oropharynx and  
359 intestinal tract on antibiotic resistance in ICUs a randomized clinical trial. *J Am Med Assoc* 2014; 312:  
360 1429–37.
- 361 7. Wittekamp BHJ, Oostdijk EAN, Cuthbertson BH, Brun-Buisson C, Bonten MJM. Selective  
362 decontamination of the digestive tract (SDD) in critically ill patients: a narrative review. *Intensive Care*  
363 *Med* 2019; 46: 343–9.
- 364 8. Velkov T, Thompson PE, Nation RL, Li J. Structure-activity relationships of polymyxin antibiotics. *J*  
365 *Med Chem* 2010; 53: 1898–916.
- 366 9. Domingues MM, Inácio RG, Raimundo JM, Martins M, Castanho MARB, Santos NC. Biophysical  
367 characterization of polymyxin B interaction with LPS aggregates and membrane model systems.  
368 *Biopolymers* 2012; 98: 338–44.
- 369 10. Putker F, Bos MP, Tommassen J. Transport of lipopolysaccharide to the Gram-negative bacterial cell

- 370 surface. *FEMS Microbiol Rev* 2015; 39: 985–1002.
- 371 **11.** Sabnis A, Klöckner A, Becce M, *et al.* Colistin kills bacteria by targeting lipopolysaccharide in the  
372 cytoplasmic membrane. *bioRxiv* 2018: 479618.
- 373 **12.** Blair JMA, Webber MA, Baylay AJ, Ogbolu DO, Piddock LJV. Molecular mechanisms of antibiotic  
374 resistance. *Chem Commun* 2011; 47: 4055–61.
- 375 **13.** Simpson BW, Trent MS. Pushing the envelope: LPS modifications and their consequences. *Nat Rev*  
376 *Microbiol* 2019; 17: 403–16.
- 377 **14.** Bourrel AS, Poirel L, Royer G, *et al.* Colistin resistance in Parisian inpatient faecal *Escherichia coli*  
378 as the result of two distinct evolutionary pathways. *J Antimicrob Chemother* 2019; 74: 1521–30.
- 379 **15.** Janssen AB, Bartholomew TL, Marciszewska NP, *et al.* Nonclonal emergence of colistin resistance  
380 associated with mutations in the BasRS two-component system in *Escherichia coli* bloodstream isolates.  
381 *mSphere* 2020; 5: e00143-20.
- 382 **16.** Cannatelli A, Giani T, Aiezza N, *et al.* An allelic variant of the PmrB sensor kinase responsible for  
383 colistin resistance in an *Escherichia coli* strain of clinical origin. *Sci Rep* 2017; 7: 5071.
- 384 **17.** Liu YY, Wang Y, Walsh TR, *et al.* Emergence of plasmid-mediated colistin resistance mechanism  
385 MCR-1 in animals and human beings in China: a microbiological and molecular biological study. *Lancet*  
386 *Infect Dis* 2016; 16: 161–8.
- 387 **18.** Wang R, van Dorp L, Shaw LP, *et al.* The global distribution and spread of the mobilized colistin  
388 resistance gene *mcr-1*. *Nat Commun* 2018; 9: 1179.
- 389 **19.** Llobet E, Tomás JM, Bengoechea JA. Capsule polysaccharide is a bacterial decoy for antimicrobial  
390 peptides. *Microbiology* 2008; 154: 3877–86.
- 391 **20.** Padilla E, Llobet E, Doménech-Sánchez A, Martínez-Martínez L, Bengoechea JA, Albertí S.  
392 *Klebsiella pneumoniae* AcrAB efflux pump contributes to antimicrobial resistance and virulence.  
393 *Antimicrob Agents Chemother* 2010; 54: 177–83.
- 394 **21.** Timsit JF, Bassetti M. Antipathy against SDD is justified: Yes. *Intensive Care Med* 2018; 44: 1165–8.
- 395 **22.** Halaby T, Al Naiemi N, Kluytmans J, van der Palen J, Vandenbroucke-Grauls CMJE. Emergence of

- 396 colistin resistance in Enterobacteriaceae after the introduction of selective digestive tract decontamination  
397 in an intensive care unit. *Antimicrob Agents Chemother* 2013; 57: 3224–3229.
- 398 **23.** Lübbert C, Fauchaux S, Becker-Rux D, *et al.* Rapid emergence of secondary resistance to gentamicin  
399 and colistin following selective digestive decontamination in patients with KPC-2-producing *Klebsiella*  
400 *pneumoniae*: a single-centre experience. *Int J Antimicrob Agents* 2013; 42: 565–70. Available at:  
401 <http://www.ncbi.nlm.nih.gov/pubmed/24100228>. Accessed November 12, 2013.
- 402 **24.** van Hout D, Janssen AB, Rentenaar RJ, Vlooswijk JPM, Boel CHE, Bonten MJM. The added value  
403 of the selective SuperPolymyxin™ medium in detecting rectal carriage of Gram-negative bacteria with  
404 acquired colistin resistance in intensive care unit patients receiving selective digestive decontamination.  
405 *Eur J Clin Microbiol Infect Dis* 2019.
- 406 **25.** Baba T, Ara T, Hasegawa M, *et al.* Construction of *Escherichia coli* K-12 in-frame, single-gene  
407 knockout mutants: the Keio collection. *Mol Syst Biol* 2006; 2: 2006.0008.
- 408 **26.** Zhou L, Lei X, Bochner BR, Wanner BL. Phenotype microarray analysis of *Escherichia coli* K-12  
409 mutants with deletions of all two-component systems. *J Bacteriol* 2003; 185: 4956–72.
- 410 **27.** McKenzie GJ, Craig NL. Fast, easy and efficient: site-specific insertion of transgenes into  
411 Enterobacterial chromosomes using Tn7 without need for selection of the insertion event. *BMC Microbiol*  
412 2006; 6: 39.
- 413 **28.** European Committee on Antimicrobial Susceptibility Testing (EUCAST). *Recommendations for MIC*  
414 *determination of colistin (polymyxin E) as recommended by the joint CLSI-EUCAST Polymyxin*  
415 *Breakpoints Working Group*. 2016.
- 416 **29.** Andrews JM. Determination of minimum inhibitory concentrations. *J Antimicrob Chemother* 2001;  
417 48: 5–16.
- 418 **30.** Bankevich A, Nurk S, Antipov D, *et al.* SPAdes: a new genome assembly algorithm and its  
419 applications to single-cell sequencing. *J Comput Biol* 2012; 19: 455–77.
- 420 **31.** Zankari E, Hasman H, Cosentino S, *et al.* Identification of acquired antimicrobial resistance genes. *J*  
421 *Antimicrob Chemother* 2012; 67: 2640–4.

- 422 **32.** Treangen TJ, Ondov BD, Koren S, Phillippy AM. The Harvest suite for rapid core-genome alignment  
423 and visualization of thousands of intraspecific microbial genomes. *Genome Biol* 2014; 15: 524.
- 424 **33.** Croucher NJ, Page AJ, Connor TR, *et al.* Rapid phylogenetic analysis of large samples of  
425 recombinant bacterial whole genome sequences using Gubbins. *Nucleic Acids Res* 2015; 43: e15.
- 426 **34.** Page AJ, Taylor B, Delaney AJ, *et al.* SNP-sites: rapid efficient extraction of SNPs from multi-  
427 FASTA alignments. *Microb genomics* 2016; 2: e000056.
- 428 **35.** Price MN, Dehal PS, Arkin AP. FastTree: Computing large minimum evolution trees with profiles  
429 instead of a distance matrix. *Mol Biol Evol* 2009; 26: 1641–50.
- 430 **36.** Langmead B, Salzberg SL. Fast gapped-read alignment with Bowtie 2. *Nat Methods* 2012; 9: 357–9.
- 431 **37.** Li H, Handsaker B, Wysoker A, *et al.* The Sequence Alignment/Map format and SAMtools.  
432 *Bioinformatics* 2009; 25: 2078–9.
- 433 **38.** van Mansfeld R, de Been M, Paganelli F, Yang L, Bonten M, Willems R. Within-host evolution of the  
434 Dutch high-prevalent *Pseudomonas aeruginosa* clone ST406 during chronic colonization of a patient with  
435 cystic fibrosis. *PLoS One* 2016; 11: e0158106.
- 436 **39.** Zhou Z, Alikhan NF, Mohamed K, Fan Y, Achtman M. The Enterobase user’s guide, with case  
437 studies on *Salmonella* transmissions, *Yersinia pestis* phylogeny, and *Escherichia* core genomic diversity.  
438 *Genome Res* 2020; 30: 138–52.
- 439 **40.** Choi K-H, Schweizer HP. mini-Tn7 insertion in bacteria with single *attTn7* sites: example  
440 *Pseudomonas aeruginosa*. *Nat Protoc* 2006; 1: 153–61.
- 441 **41.** Lu X, Zeng M, Xu J, *et al.* Epidemiologic and genomic insights on *mcr-1*-harbouring *Salmonella*  
442 from diarrhoeal outpatients in Shanghai, China, 2006–2016. *EBioMedicine* 2019; 42: 133–44.
- 443 **42.** Yang Q, Li M, Spiller OB, *et al.* Balancing *mcr-1* expression and bacterial survival is a delicate  
444 equilibrium between essential cellular defence mechanisms. *Nat Commun* 2017; 8: 2054.
- 445 **43.** Diene SM, Merhej V, Henry M, *et al.* The rhizome of the multidrug-resistant *Enterobacter aerogenes*  
446 genome reveals how new ‘killer bugs’ are created because of a sympatric lifestyle. *Mol Biol Evol* 2013;  
447 30: 369–83.

- 448 **44.** Wall E, Majdalani N, Gottesman S. The complex Rcs regulatory cascade. *Annu Rev Microbiol* 2018;  
449 72: 111–39.
- 450 **45.** de Jonge E, Schultz MJ, Spanjaard L, *et al.* Effects of selective decontamination of digestive tract on  
451 mortality and acquisition of resistant bacteria in intensive care: a randomised controlled trial. *Lancet*  
452 2003; 362: 1011–6.
- 453 **46.** Barroso-Batista J, Sousa A, Lourenço M, *et al.* The first steps of adaptation of *Escherichia coli* to the  
454 gut are dominated by soft sweeps. *PLoS Genet* 2014; 10: e1004182.
- 455 **47.** Lescat M, Launay A, Ghalayini M, *et al.* Using long-term experimental evolution to uncover the  
456 patterns and determinants of molecular evolution of an *Escherichia coli* natural isolate in the  
457 streptomycin-treated mouse gut. *Mol Ecol* 2017; 26: 1802–17.
- 458 **48.** Giraud A, Arous S, De Paepe M, *et al.* Dissecting the genetic components of adaptation of  
459 *Escherichia coli* to the mouse gut. *PLoS Genet* 2008; 4: e2.
- 460 **49.** Kantele A, Kuenzli E, Dunn S, *et al.* Real-time sampling of travelers shows intestinal colonization by  
461 multidrug-resistant bacteria to be a dynamic process with multiple transient acquisitions. *bioRxiv* 2019:  
462 827915.
- 463 **50.** Vasquez AM, Montero N, Laughlin M, *et al.* Investigation of *Escherichia coli* harboring the *mcr-1*  
464 resistance gene — Connecticut, 2016. *Morb Mortal Wkly Rep* 2016; 65: 979–80.
- 465 **51.** Tietgen M, Semmler T, Riedel-Christ S, *et al.* Impact of the colistin resistance gene *mcr-1* on bacterial  
466 fitness. *Int J Antimicrob Agents* 2018; 51: 554–61.
- 467 **52.** Brenner DJ, McWhorter AC, Kai A, Steigerwalt AG, Farmer JJ. *Enterobacter asburiae* sp. nov., a  
468 new species found in clinical specimens, and reassignment of *Erwinia dissolvens* and *Erwinia*  
469 *nimipressuralis* to the genus *Enterobacter* as *Enterobacter dissolvens* comb. nov., and *Enterobacter*  
470 *nimipressuralis* comb. nov.. *J Clin Microbiol* 1986; 23: 1114–20.
- 471 **53.** Pena I, Picazo JJ, Rodríguez-Avial C, Rodríguez-Avial I. Carbapenemase-producing  
472 Enterobacteriaceae in a tertiary hospital in Madrid, Spain: high percentage of colistin resistance among  
473 VIM-1-producing *Klebsiella pneumoniae* ST11 isolates. *Int J Antimicrob Agents* 2014; 43: 460–4.

- 474 **54.** Rossi F, Girardello R, Cury AP, Di Gioia TSR, Almeida JN de, Duarte AJ da S. Emergence of colistin  
475 resistance in the largest university hospital complex of São Paulo, Brazil, over five years. *Brazilian J*  
476 *Infect Dis* 2017; 21: 98–101.
- 477 **55.** Bradford PA, Kazmierczak KM, Biedenbach DJ, Wise MG, Hackel M, Sahn DF. Correlation of  $\beta$ -  
478 lactamase production and colistin resistance among Enterobacteriaceae isolates from a global surveillance  
479 program. *Antimicrob Agents Chemother* 2016; 60: 1385–92.
- 480 **56.** Boo TW, O’Connell N, Power L, *et al.* First report of IMI-1-producing colistin-resistant *Enterobacter*  
481 clinical isolate in Ireland, March 2013. *Eurosurveillance* 2013; 18: pii=20548.
- 482 **57.** Olaitan AO, Morand S, Rolain JM. Emergence of colistin-resistant bacteria in humans without  
483 colistin usage: a new worry and cause for vigilance. *Int J Antimicrob Agents* 2016; 47: 1–3.
- 484 **58.** Bollet C, Raoult D, Page J. Successive emergence of *Enterobacter aerogenes* strains resistant to  
485 imipenem and colistin in a patient. *Antimicrob Agents Chemother* 2005; 49: 1354–8.
- 486 **59.** Bedenić B, Vranić-Ladavac M, Venditti C, *et al.* Emergence of colistin resistance in *Enterobacter*  
487 *aerogenes* from Croatia. *J Chemother* 2018; 30: 120–3.
- 488 **60.** Landman D, Salamera J, Quale J. Irreproducible and uninterpretable polymyxin B MICs for  
489 *Enterobacter cloacae* and *Enterobacter aerogenes*. *J Clin Microbiol* 2013; 51: 4106–11.
- 490 **61.** Telke AA, Olaitan AO, Morand S, Rolain JM. *soxRS* induces colistin hetero-resistance in  
491 *Enterobacter asburiae* and *Enterobacter cloacae* by regulating the *acrAB-tolC* efflux pump. *J Antimicrob*  
492 *Chemother* 2017; 72: 2715–21.
- 493 **62.** MacLean RC, Vogwill T. Limits to compensatory adaptation and the persistence of antibiotic  
494 resistance in pathogenic bacteria. *Evol Med Public Heal* 2015; 2015: 4–12.
- 495 **63.** Campos MA, Vargas MA, Regueiro V, Llompert CM, Albertí S, Bengoechea JA. Capsule  
496 polysaccharide mediates bacterial resistance to antimicrobial peptides. *Infect Immun* 2004; 72: 7107–14.
- 497 **64.** Spinoso MR, Progida C, Talà A, Cogli L, Alifano P, Bucci C. The *Neisseria meningitidis* capsule is  
498 important for intracellular survival in human cells. *Infect Immun* 2007; 75: 3594–603.
- 499 **65.** Cress BF, Englaender JA, He W, Kasper D, Linhardt RJ, Koffas MAG. Masquerading microbial

500 pathogens: capsular polysaccharides mimic host-tissue molecules. *FEMS Microbiol Rev* 2014; 38: 660–  
501 97.

502 **66.** Russo TA, Davidson BA, Carlino-MacDonald UB, Helinski JD, Priore RL, Knight PR. The effects of  
503 *Escherichia coli* capsule, O-antigen, host neutrophils, and complement in a rat model of Gram-negative  
504 pneumonia. *FEMS Microbiol Lett* 2003; 226: 355–61.

505 **67.** de Smet AMGA, Kluytmans JAJW, Blok HEM, *et al.* Selective digestive tract decontamination and  
506 selective oropharyngeal decontamination and antibiotic resistance in patients in intensive-care units: an  
507 open-label, clustered group-randomised, crossover study. *Lancet Infect Dis* 2011; 11: 372–80.

508 **68.** Monaco M, Giani T, Raffone M, *et al.* Colistin resistance superimposed to endemic carbapenem-  
509 resistant *Klebsiella pneumoniae*: a rapidly evolving problem in Italy, November 2013 to April 2014.  
510 *Eurosurveillance* 2014; 19: 20939.

511 **69.** McNally A, Cheng L, Harris SR, Corander J. The evolutionary path to extraintestinal pathogenic,  
512 drug-resistant *Escherichia coli* is marked by drastic reduction in detectable recombination within the core  
513 genome. *Genome Biol Evol* 2013; 5: 699–710.

514 **70.** Malek A, McGlynn K, Taffner S, *et al.* Next-generation-sequencing-based hospital outbreak  
515 investigation yields insight into *Klebsiella aerogenes* population structure and determinants of  
516 carbapenem resistance and pathogenicity. *Antimicrob Agents Chemother* 2019; 63: e02577-18.

517

518

519 **Tables**

520

| Strain | Date of isolation | Patient | Species                      | Colistin MIC (mg/L) |
|--------|-------------------|---------|------------------------------|---------------------|
| 24     | 6 August 2018     | 37      | <i>Klebsiella aerogenes</i>  | 0.25                |
| 25     | 6 August 2018     | 37      | <i>Klebsiella aerogenes</i>  | 32                  |
| 26     | 9 August 2018     | 37      | <i>Klebsiella aerogenes</i>  | 32                  |
| 27     | 9 August 2018     | 37      | <i>Klebsiella aerogenes</i>  | 32                  |
| 32     | 7 September 2018  | 307     | <i>Enterobacter asburiae</i> | 8192                |
| 89     | 26 July 2018      | 337     | <i>Escherichia coli</i>      | 0.25                |
| 137    | 30 August 2018    | 27      | <i>Escherichia coli</i>      | 0.125               |
| 138    | 30 August 2018    | 27      | <i>Escherichia coli</i>      | 8                   |
| 260    | 1 November 2018   | 31      | <i>Escherichia coli</i>      | 16                  |
| 262    | 1 November 2018   | 31      | <i>Escherichia coli</i>      | 16                  |
| 263    | 1 November 2018   | 311     | <i>Escherichia coli</i>      | 4                   |
| 274    | 5 November 2018   | 31      | <i>Escherichia coli</i>      | 16                  |
| 281    | 8 November 2018   | 31      | <i>Escherichia coli</i>      | 16                  |
| 292    | 14 November 2018  | 31      | <i>Escherichia coli</i>      | 16                  |
| 296    | 14 November 2018  | 31      | <i>Escherichia coli</i>      | 16                  |
| 297    | 14 November 2018  | 31      | <i>Escherichia coli</i>      | 16                  |

521 **Table 1. Strains isolated in this study and relevant metadata.** The species of each isolate was

522 determined by MALDI-TOF on a Bruker microflex system (Leiderdorp, The Netherlands). The MIC

523 value of the broth microdilution method represents the median value of three independent replicates of

524 colistin susceptibility testing, performed in triplicate.



| Strain               | Colistin MIC (mg/L) |
|----------------------|---------------------|
| BW25113              | 0.125               |
| BW27848              | 0.25                |
| BW25113::Tn7 Empty   | 0.125               |
| BW27848::Tn7 Empty   | 0.125               |
| BW27848::Tn7 BW25113 | 0.125               |
| BW27848::Tn7 281     | 1                   |
| BW27848::Tn7 281m    | 0.125               |
| BW27848::Tn7 263     | 0.25                |
| BW27848::Tn7 263m    | 0.125               |

525

526 **Table 2. Colistin MICs of strains generated in this study.** *E. coli* strain BW27848 is the  $\Delta$ *basRS*  
527 mutant of BW25113.<sup>26</sup> The *basRS* alleles of colistin-resistant strains from this study were inserted into the  
528 *attTn7* site of BW27848. The addition of “m” to a strain name indicates that the construct has been  
529 modified through inverse PCR site-directed mutagenesis to reverse the mutation associated with colistin  
530 resistance.

531

532

533

534 **Figure legends**

535

536 **Figure 1. Timeline of rectal swabs collected from SDD-treated ICU patients and isolation of**

537 **colistin-susceptible, or colistin-resistant strains.** Filled circle: isolation of colistin-resistant strain from

538 rectal swab. Filled triangle; a colistin-susceptible strain of the same species as the colistin-resistant strain

539 was isolated from the rectal swab. Open diamonds, no naturally colistin-susceptible Gram-negative

540 bacteria were isolated. The symbols are colour coded according to the species of the isolated strain:

541 *Klebsiella aerogenes*, blue; *Enterobacter asburiae*, green; *Escherichia coli*, yellow, orange and red.

542 Multiple symbols on the same day indicate the isolation of multiple strains from the same swab. The

543 length of ICU admission is indicated by a line, and discharge is indicated by a circle at the end of the line.

544

545 **Figure 2. Phylogeny and acquired resistance genes of colistin-resistant *E. coli* and *K. aerogenes*.** A)

546 The phylogenetic tree of *E. coli* represents the core genome alignment (2.1 Mbp) of 198 genomes (178

547 genomes from public databases, the genomes of the nine colistin-resistant strains, and the two

548 colistin-susceptible strains). One representative reference strain per *E. coli* phylogroup is indicated <sup>69</sup>.

549 Phylogroup A is coloured dark blue; B1, yellow; B2, light blue; D, green; E, purple; F, pink.

550 Colistin-susceptible and -resistant strains are indicated by filled triangles and circles respectively. The

551 studied strains are highlighted with colours corresponding to Figure 1. B) The phylogenetic tree of

552 *K. aerogenes* represents a core genome alignment (1.6 Mbp) of 56 publicly available genomes, and the

553 three colistin-resistant strains described in this study. Colistin-susceptible and -resistant strains are

554 indicated by filled triangles and circles respectively. The studied strains are highlighted with colours

555 corresponding to Figure 1. The genomes of the dominant *K. aerogenes* ST4 and ST93 lineages associated

556 with infections have a red and green background respectively <sup>70</sup>. C) Acquired antibiotic resistance genes

557 of colistin-resistant strains. Strains are grouped according to the patient from which they were isolated.

558 Species and MLST type are indicated per strain. Antibiotic resistance genes in the genomes of the

559 colistin-resistant strains were detected by ResFinder 3.2 <sup>31</sup>. Classes of antibiotic resistance genes are

560 abbreviated as follow: PMX, polymyxin resistance; BLA, beta-lactam resistance; QLN, quinolone  
561 resistance; FOS, fosfomycin resistance; AGC, aminoglycoside resistance; MCL, macrolide, lincosamide,  
562 and streptogramin B resistance; PHE, phenicol resistance; SUL, sulfonamide resistance; TET, tetracycline  
563 resistance; TMP, trimethoprim resistance. N.D.; not determined.

564

565 **Figure 3. *In vivo* microevolution of colistin-resistant *E. coli* strains isolated from patient 31.** A) Mid-  
566 point rooted phylogenetic tree representing a recombination-filtered core genome alignment of the strains  
567 isolated from patient 31. Branches with the BasR G53A substitution, the BasS  $\Delta$ aa4-9 deletion, and the  
568 I424S substitution in Yrff are indicated through a green, orange, and purple background respectively.  
569 Other mutations are indicated next to the relevant branch. B) Growth phenotypes of the *E. coli* strains  
570 isolated from patient 31 on TSA plates with 5% sheep blood after overnight growth at 37°C. C)  
571 Maximum specific growth rate of colistin-resistant *E. coli* strains isolated from patient 31. The values  
572 presented represent mean with standard deviation, of three independent experiments, performed in  
573 duplicate. Statistical significance testing was performed using a parametric one-way ANOVA test with  
574 Tukey's multiple comparisons test. Family-wise significance was defined as a p-value < 0.05. The growth  
575 rates of strains marked by the same letter differ statistically significantly from those with other letters.

576

577

578 **Supplemental materials**

579

580 **Supplemental Figure 1. Maximum specific growth rate of *K. aerogenes* strains.** Maximum specific  
581 growth rate of the colistin-susceptible, and colistin-resistant *K. aerogenes* strains isolated from patient 37.  
582 The values presented represent the means with standard deviations of three independent experiments  
583 performed in triplicate. Statistical significance testing was performed by comparing the maximum  
584 specific growth rate of the colistin-susceptible strain 24, with those of the colistin-resistant strains through  
585 a parametric one-way ANOVA test, with a Dunnett's multiple comparisons test. Family-wise significance  
586 was defined as a p-value < 0.05. No statistical significant differences were observed between the  
587 maximum specific growth rates of the strains.

588

589 **Supplemental Table 1. Oligonucleotides used in this study.**

590

591 **Supplemental Table 2. Strains used for phylogenetic analyses.** A total of 178 *E. coli* and 56  
592 *K. aerogenes* genome sequences obtained from NCBI databases were used for construction of  
593 phylogenetic trees. When multiple assemblies had the same strain name, a numerical indicator was added.

594

595

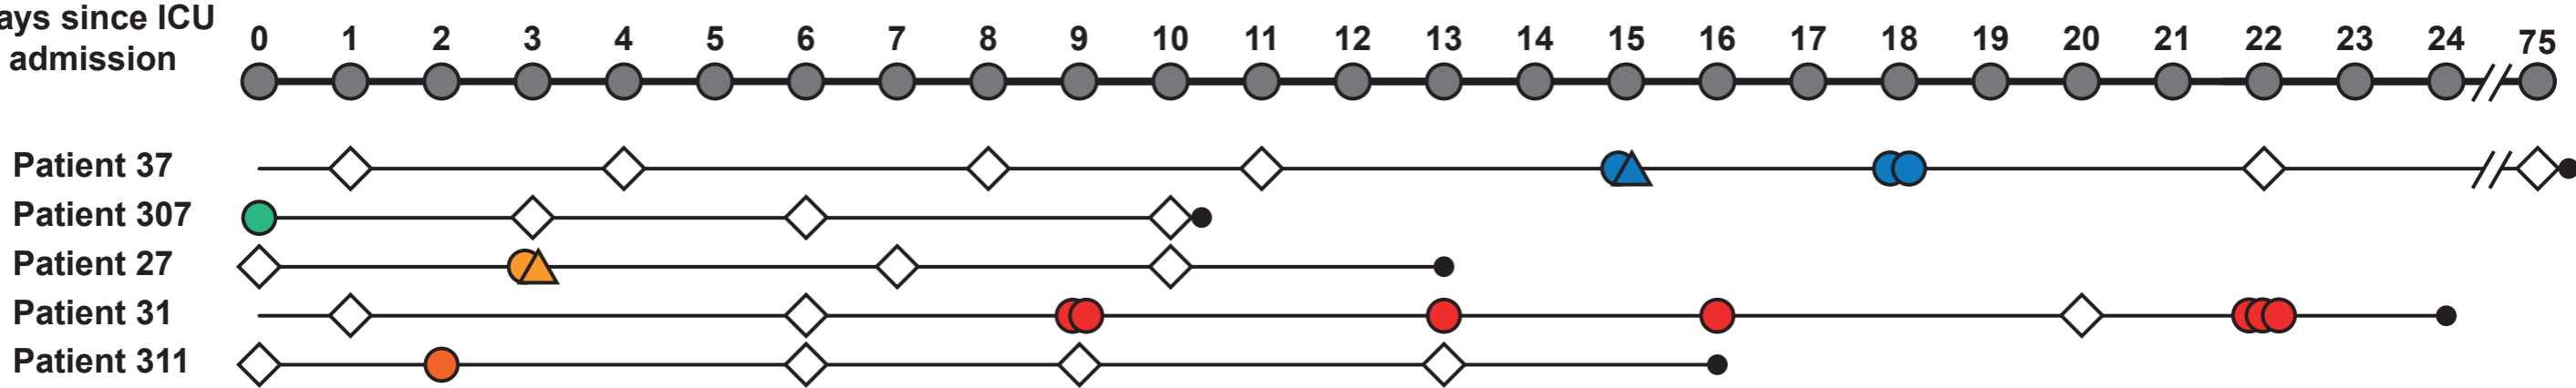

**(a)**

bioRxiv preprint doi: <https://doi.org/10.1101/2020.04.26.059891>; this version posted April 26, 2020. The copyright holder for this preprint (which was not certified by peer review) is the author/funder, who has granted bioRxiv a license to display the preprint in perpetuity. It is made available under aCC-BY-NC 4.0 International license.

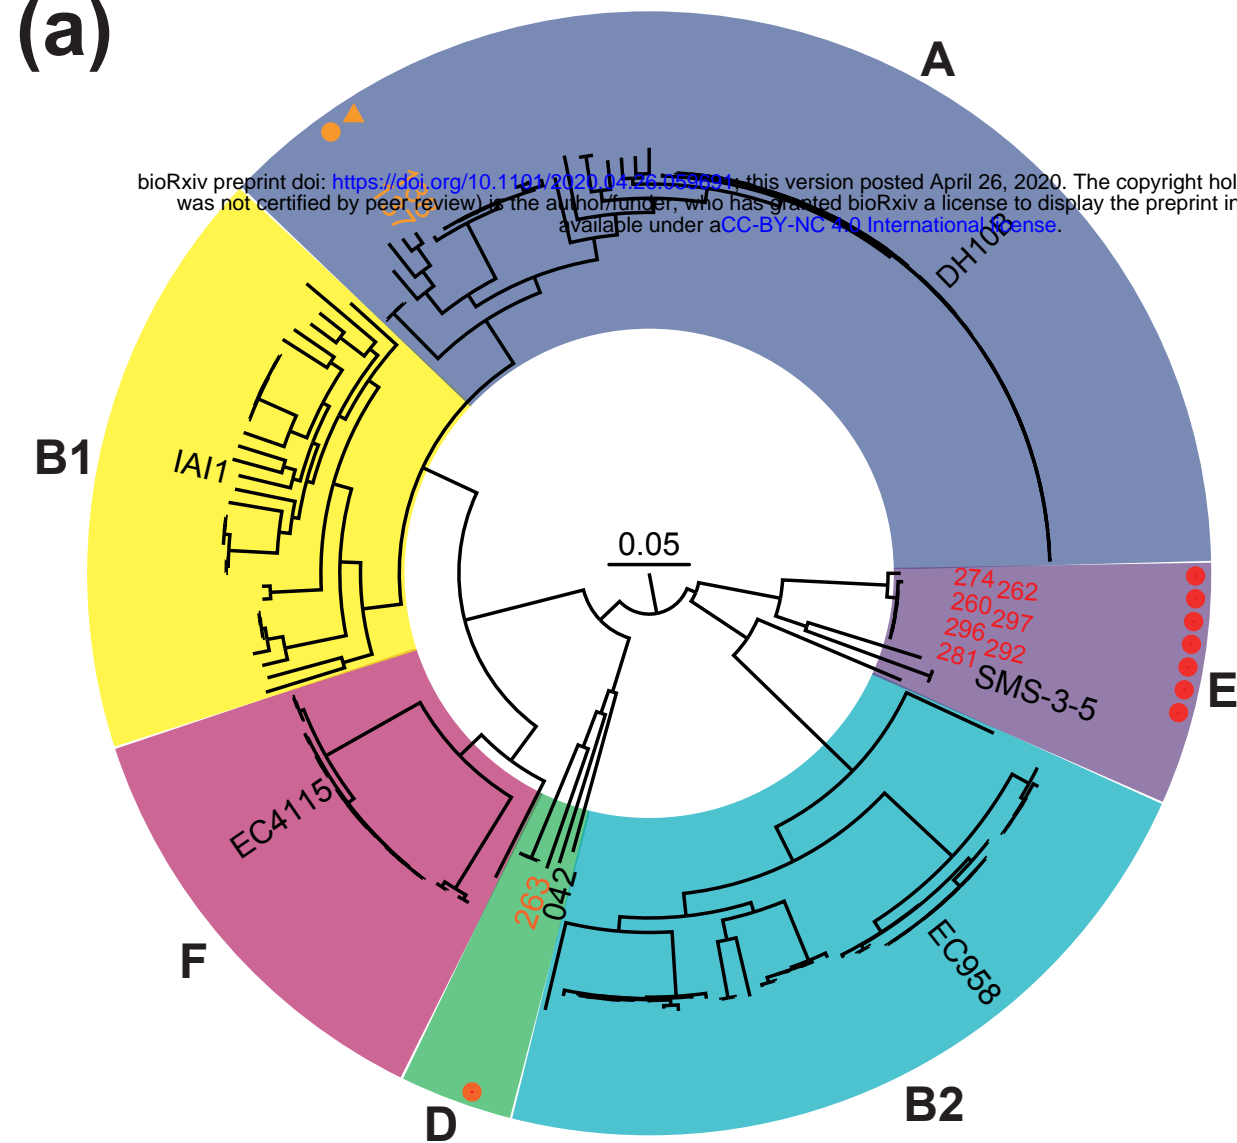**(b)**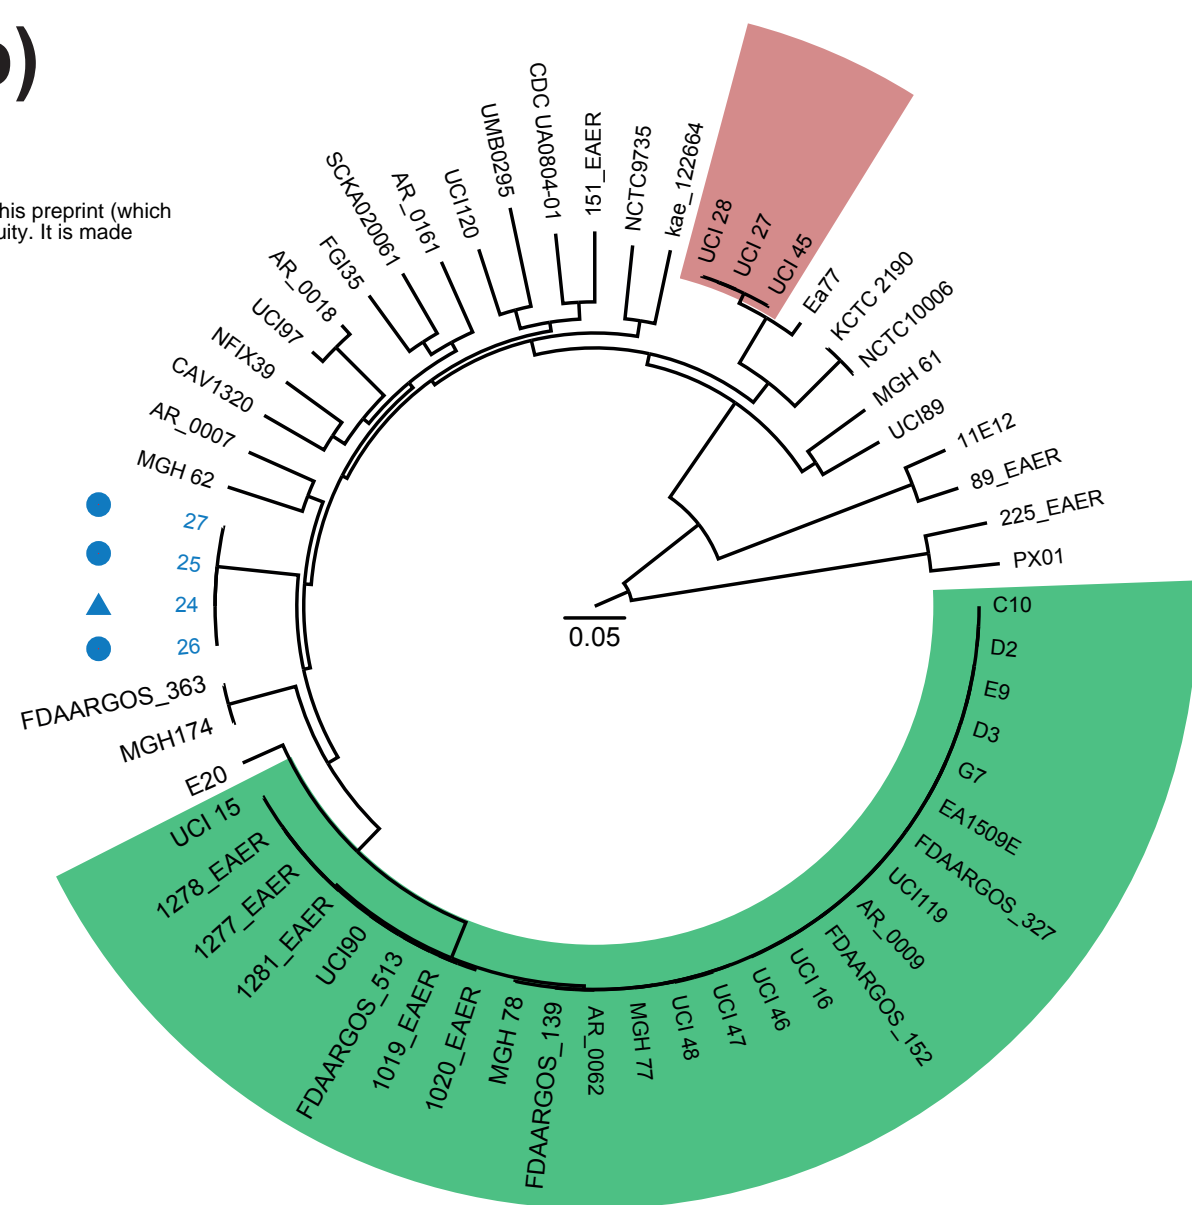**(c)**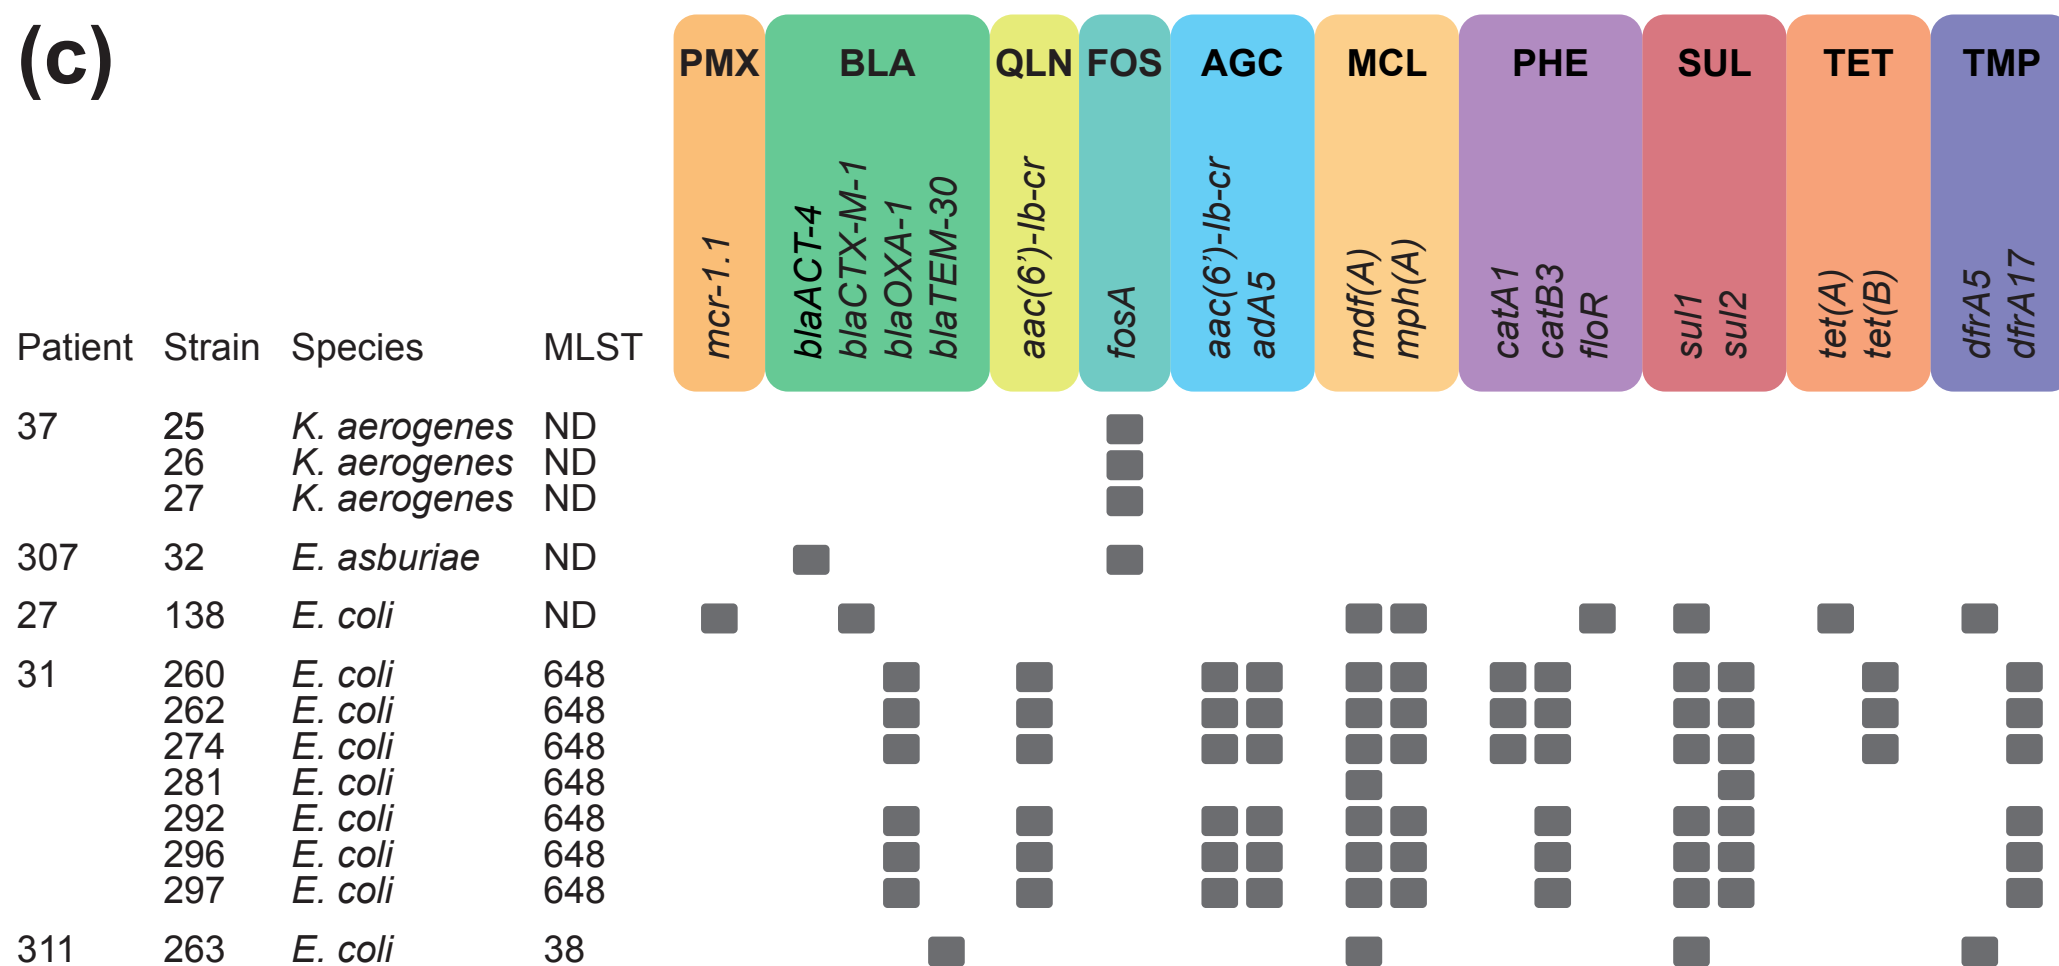

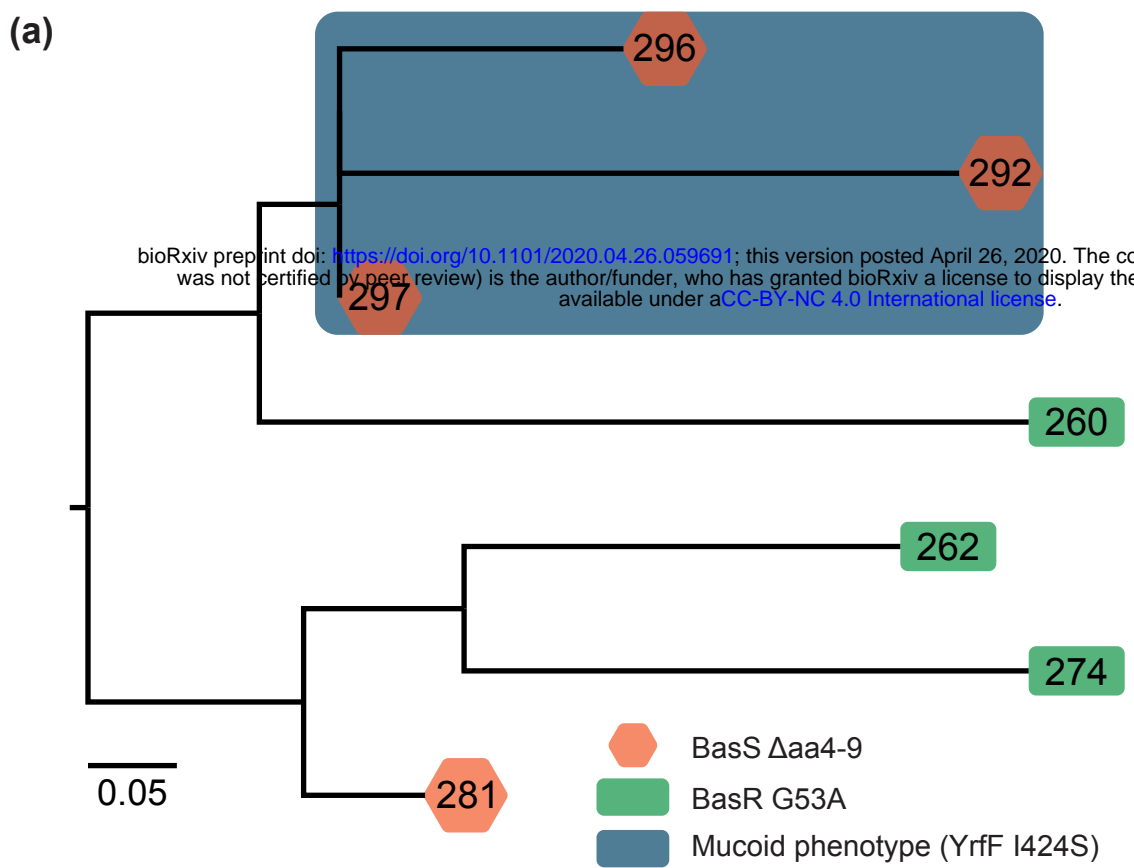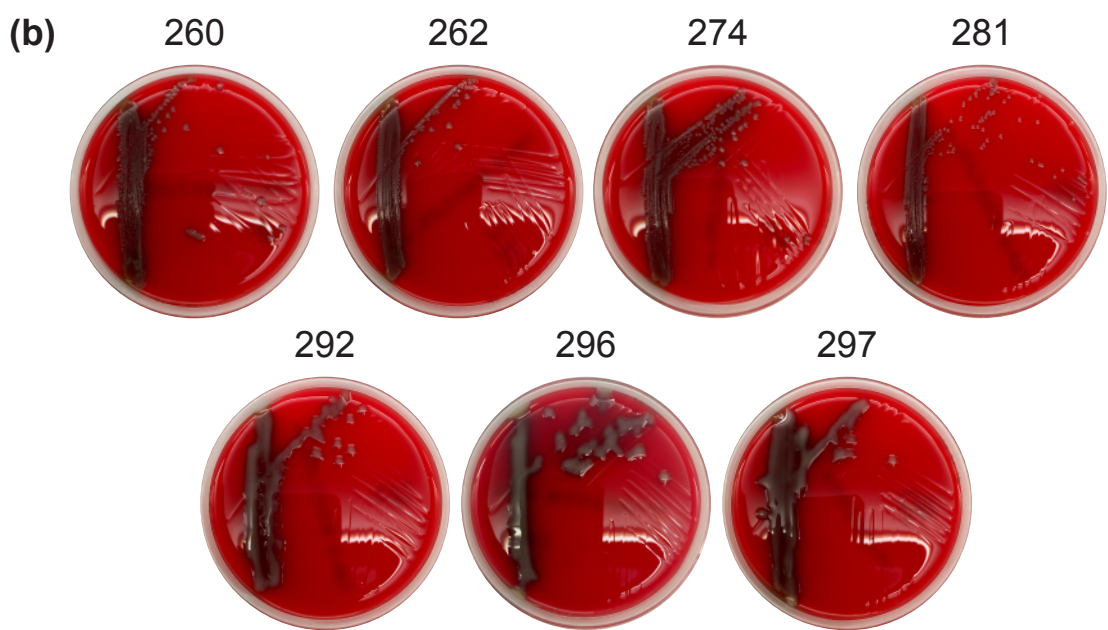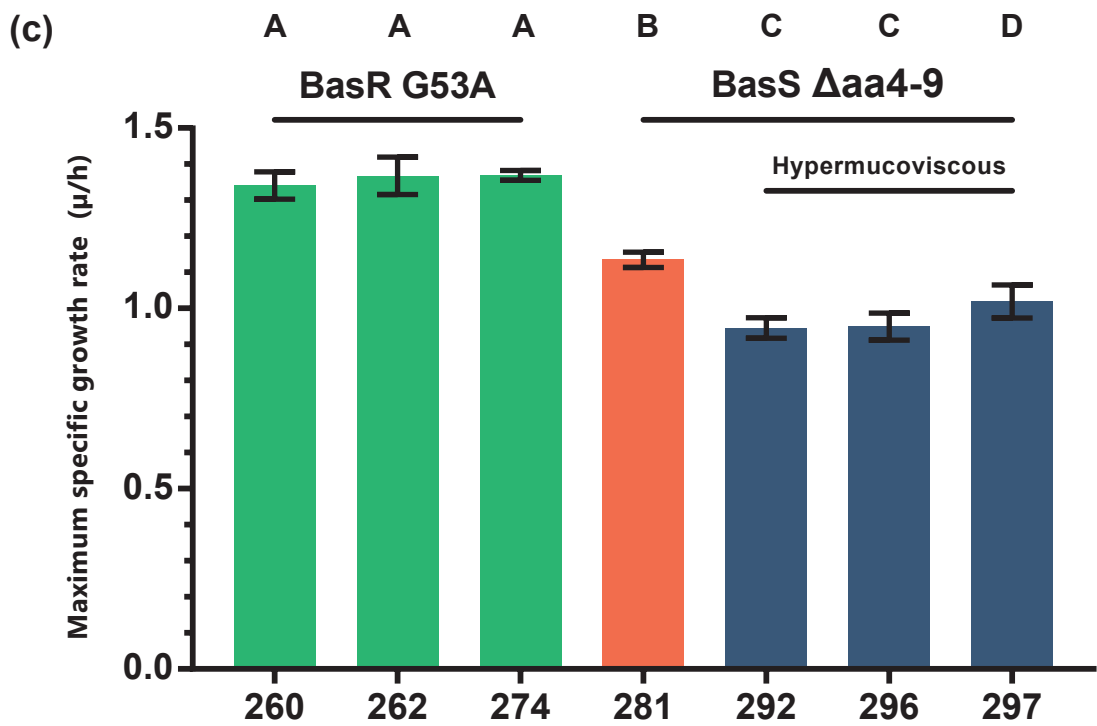

Source: https://biorxiv.org/content/10.1101/2020.04.26.059691v1.full.pdf
